# Supplementary material for: Heterologous Expression and Characterization of A Novel Ochratoxin A Degrading Enzyme, N-acyl-L-amino Acid Amidohydrolase, from Alcaligenes faecalis
Source: PubMed Central journal article supplement (PMC6784128; doi:10.3390/toxins11090518), 2019-09-06
Supplement: toxins-11-00518-s001.pdf [file toxins-11-00518-s001.pdf]

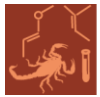

# Supplementary Materials: Heterologous Expression and Characterization of A Novel Ochratoxin A Degrading Enzyme, N-acyl-L-amino Acid Amidohydrolase, from *Alcaligenes faecalis*

Honghai Zhang, Yunpeng Zhang, Tie Yin, Jing Wang and Xiaolin Zhang

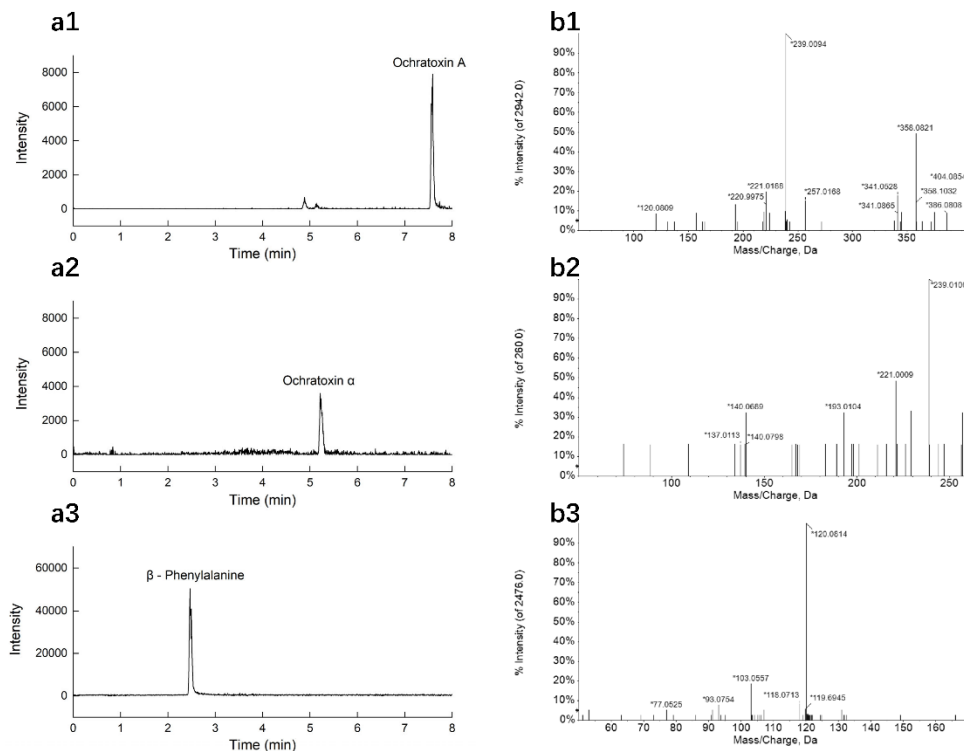

**Figure S1.** The extract ion chromatogram and MS/MS spectrum of (a1 and b1) ochratoxin A, (a2 and b2) ochratoxin  $\alpha$  or (a3 and b3)  $\beta$ -phenylalanine, which the sample processed by rAfOTase.

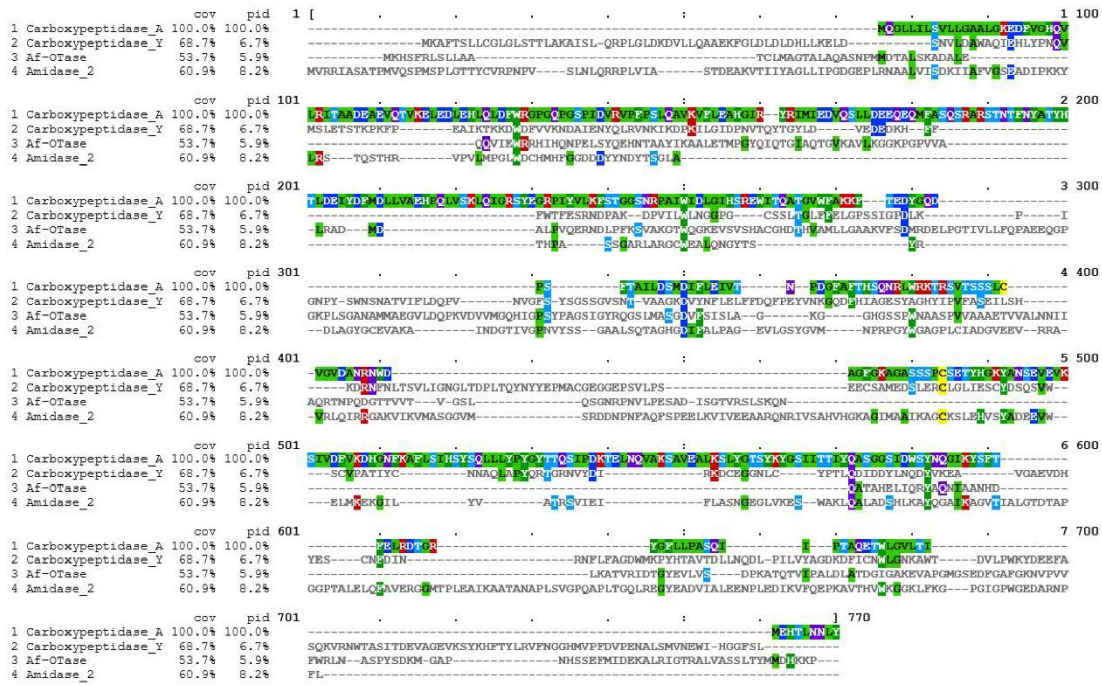

**Figure S2.** Multiple alignment of partial known ochratoxin A degrading enzymes. 1: Carboxypeptidase A from bovine pancreas; 2: Carboxypeptidase Y from *Saccharomyces cerevisiae*; 3: AfOTase from *Alcaligenes faecalis*; 4: Amidase 2 from *Aspergillus niger*.

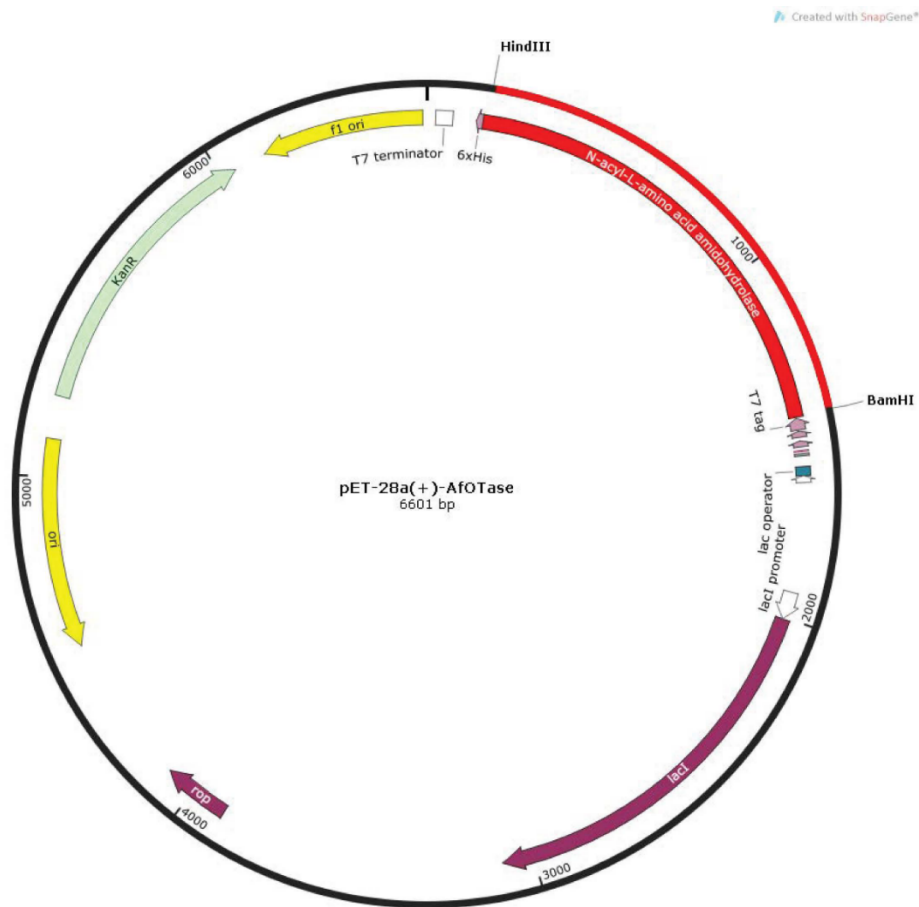

**Figure S3.** Plasmid map for *Alcaligenes faecalis* OTase expression vector pET-28a(+)-rAfOTase.

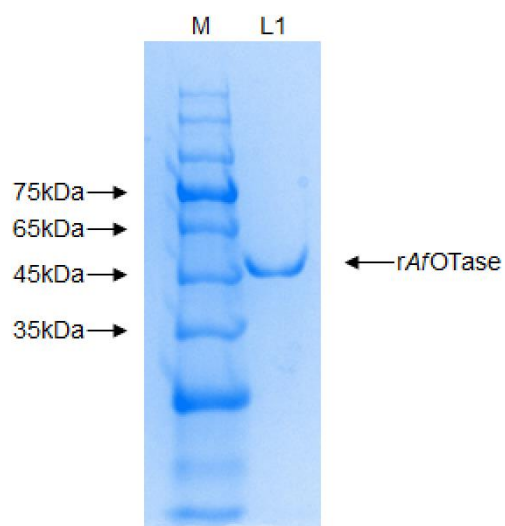

**Figure S4.** SDS-PAGE analysis of rAfOTase; M, protein size markers; L1, rAfOTase was purified by Ni<sup>2+</sup>-NTA resin.

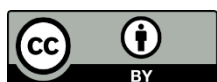

© 2019 by the author. Licensee MDPI, Basel, Switzerland. This article is an open access article distributed under the terms and conditions of the Creative Commons Attribution (CC BY) license (<http://creativecommons.org/licenses/by/4.0/>).
